# Supplementary material for: Fungal colonization of an Ordovician impact-induced hydrothermal system
Source: PubMed Central journal article supplement — Sci Rep. 2013 Dec 16;3:3487. doi: 10.1038/srep03487 (PMC3864048; doi:10.1038/srep03487), 2013-12-16
Supplement: srep03487-s1.pdf [file srep03487-s1.pdf]

Supplementary information for manuscript “Fungal colonization of an Ordovician impact-induced hydrothermal system”, by Ivarsson, M., Broman, C., Sturkell, E., Ormö, J., Siljeström, S., van Zuilen, M., and Bengtson, S.

S1. Table of Raman measurements performed on 17 samples from the Lockne impact structure indicating a calculated average temperature of ca. 250°C.

| Analysis     | RA1  | RA2          | avg-RA1     | avg-T      |
|--------------|------|--------------|-------------|------------|
| 185.40-spec1 | 0,58 | 1,41         |             |            |
| 185.40-spec2 | 0,54 | 1,17         |             |            |
| 185.40-spec5 | 0,59 | 1,44         |             |            |
| 185.40-spec6 | 0,58 | 1,38         | 0,57        | 247        |
| 215.90-spec2 | 0,59 | 1,46         |             |            |
| 215.90-spec3 | 0,62 | 1,66         |             |            |
| 215.90-spec4 | 0,60 | 1,48         |             |            |
| 215.90-spec6 | 0,58 | 1,40         | 0,60        | 280        |
| 216.0-spec1  | 0,61 | 1,55         |             |            |
| 216.0-spec2  | 0,57 | 1,31         |             |            |
| 216.0-spec3  | 0,58 | 1,40         |             |            |
| 216.0-spec4  | 0,58 | 1,38         |             |            |
| 216.0-spec5  | 0,58 | 1,41         | 0,58        | 261        |
| 219.60-spec4 | 0,55 | 1,24         |             |            |
| 219.60-spec5 | 0,52 | 1,06         |             |            |
| 219.60-spec6 | 0,55 | 1,20         |             |            |
| 219.60-spec7 | 0,59 | 1,44         | 0,55        | 219        |
|              |      | <b>total</b> | <b>0,58</b> | <b>252</b> |

S2. Table of carbon isotope analysis.

| No | Sample | $\delta^{13}\text{C}$ vs PDB (‰) |
|----|--------|----------------------------------|
| 1  | 219,6  | -26,96                           |

|   |             |        |
|---|-------------|--------|
| 2 | 215,9       | -22,85 |
| 3 | skräp 219.4 | -27,36 |
| 4 | 219,4       | -27,80 |
| 5 | 139,8       | -30,35 |

S3. Table of sample depths.

Depth  
171.30  
181.70  
185.40  
215.75  
215.90  
216.00  
219.40  
219.60  
219.90
